# Supplementary material for: Mechanism of bidirectional thermotaxis in Escherichia coli
Source: eLife. 2017 Aug 3;6:e26607. doi: 10.7554/eLife.26607 (PMC5578741; doi:10.7554/eLife.26607)
Supplement: Figure 1—source data 1. [file elife-26607-fig1-data1.xlsx]

## Sheet: Figure 1B
T increase to	wildtype	stderror	DcheA	stderror
24	0.72759	0.054785	0.013696	0
27	0.80326	0.084322	0.021081	0
30	0.7352	0.15973	0.039932	0
33	0.46015	0.053936	0.013484	0
36	0.31284	0.074255	0.018564	0
39	0.19339	0.035948	0.008987	0
42	0.084472	0.057092	0.014273	0
