# Supplementary material for: Mechanism of bidirectional thermotaxis in Escherichia coli
Source: eLife. 2017 Aug 3;6:e26607. doi: 10.7554/eLife.26607 (PMC5578741; doi:10.7554/eLife.26607)
Supplement: Figure 1—source data 3. [file elife-26607-fig1-data3.xlsx]

## Sheet: Fig1_sup2B
running distance (pixel)	21°C	27°C	33°C	39°C
1
2
3
4	0.00026713	0.0003754	0.00034019
5	0.00029141	0.00039749	0.00034019
6	0.00037756	0.00030876	0.00041957	0.00034019
7	0.00041019	0.00031917	0.00041957	0.00034019
8	0.00047078	0.00032611	0.00041957	0.00034019
9	0.00049409	0.00033304	0.00041957	0.00034019
10	0.00049875	0.00035386	0.00041957	0.00034914
11	0.00051273	0.00037468	0.00041957	0.00042524
12	0.00053604	0.00041284	0.00041957	0.00044314
13	0.00058265	0.00045794	0.00043061	0.00047895
14	0.0006246	0.00052038	0.00046373	0.00047895
15	0.00066655	0.00056895	0.00051342	0.00050581
16	0.00067588	0.00059324	0.00058519	0.00051476
17	0.00075978	0.00061058	0.00060727	0.00055504
18	0.00082037	0.00060017	0.00062935	0.00057742
19	0.00086698	0.00066956	0.00063487	0.00060428
20	0.00094156	0.00074241	0.00065696	0.00064904
21	0.0010068	0.00079445	0.00070112	0.00066695
22	0.0010534	0.00082914	0.00072872	0.0006938
23	0.0011606	0.00087424	0.00081153	0.00074304
24	0.0012632	0.00098873	0.00084466	0.00077885
25	0.001389	0.0011171	0.00091643	0.00082809
26	0.0015895	0.0013356	0.0010765	0.00089971
27	0.0019064	0.0017311	0.0012311	0.001025
28	0.0023353	0.0022481	0.0015237	0.0012399
29	0.0029645	0.0030009	0.0019433	0.0015174
30	0.0039387	0.004059	0.0026389	0.0020053
31	0.0052998	0.0054779	0.0036712	0.0028066
32	0.0071876	0.0070772	0.0049851	0.0039256
33	0.0095182	0.0086384	0.0064039	0.0053087
34	0.011742	0.0098734	0.0077951	0.006853
35	0.013303	0.010578	0.008833	0.0080616
36	0.013629	0.010682	0.0091698	0.0086166
37	0.012795	0.010189	0.0087778	0.0084823
38	0.011131	0.0092281	0.0079276	0.0079139
39	0.0090894	0.0082706	0.0070333	0.007126
40	0.0073834	0.0076531	0.0064757	0.0065441
41	0.006288	0.007549	0.0063819	0.0066605
42	0.0059291	0.007941	0.0068235	0.0073946
43	0.0061994	0.0089506	0.007624	0.0086748
44	0.0068054	0.010106	0.0087116	0.010018
45	0.0075325	0.010945	0.0096722	0.011137
46	0.0081571	0.01158	0.010401	0.011728
47	0.0087118	0.012139	0.010771	0.011835
48	0.0094017	0.012316	0.010964	0.011302
49	0.010124	0.012205	0.01108	0.010671
50	0.010921	0.012	0.011157	0.010358
51	0.011695	0.011948	0.011074	0.010161
52	0.012259	0.01167	0.01066	0.0099505
53	0.01224	0.010984	0.0099427	0.0094716
54	0.011527	0.0099879	0.0088772	0.008733
55	0.010236	0.0088222	0.0078062	0.0077617
56	0.0086093	0.0077745	0.0068677	0.0067142
57	0.0069918	0.006869	0.0062052	0.0059533
58	0.0058125	0.006314	0.0060837	0.0056042
59	0.0051506	0.0059983	0.0063322	0.0055818
60	0.0049642	0.006144	0.0069229	0.0058011
61	0.0052112	0.0066644	0.0078117	0.0062711
62	0.0057473	0.0074102	0.0088551	0.0069918
63	0.0066236	0.0085169	0.010053	0.0078154
64	0.0079427	0.010137	0.011417	0.0087464
65	0.0098258	0.012319	0.013084	0.0099371
66	0.012478	0.014723	0.015237	0.011432
67	0.015974	0.017124	0.017302	0.013411
68	0.02002	0.019108	0.018985	0.015568
69	0.023707	0.020323	0.019493	0.017247
70	0.02587	0.020888	0.018936	0.017976
71	0.025776	0.020597	0.018014	0.01794
72	0.023749	0.019528	0.017683	0.01773
73	0.021236	0.018852	0.018235	0.018084
74	0.019778	0.018814	0.019692	0.019561
75	0.020029	0.019192	0.021133	0.021414
76	0.02119	0.01916	0.021542	0.022927
77	0.021796	0.018432	0.021155	0.0232
78	0.020896	0.017644	0.02015	0.022251
79	0.018407	0.016701	0.018356	0.020335
80	0.015303	0.015077	0.01718	0.018361
81	0.012734	0.013513	0.016556	0.017036
82	0.011331	0.012853	0.016137	0.016683
83	0.011028	0.012937	0.01596	0.016893
84	0.01142	0.012808	0.015099	0.017206
85	0.011816	0.012271	0.013857	0.017018
86	0.011863	0.011594	0.013117	0.01615
87	0.011728	0.011313	0.012223	0.014718
88	0.011625	0.01132	0.011411	0.013361
89	0.011569	0.011421	0.010865	0.012206
90	0.011536	0.011244	0.010738	0.011459
91	0.011369	0.010768	0.010782	0.010935
92	0.010935	0.010432	0.010693	0.010788
93	0.010455	0.010512	0.010451	0.010514
94	0.010283	0.010626	0.010037	0.0099326
95	0.010217	0.01029	0.0094403	0.0092836
96	0.010208	0.0096791	0.009087	0.0086121
97	0.01025	0.0087598	0.0087337	0.0079139
98	0.009933	0.0076149	0.0081374	0.0071798
99	0.009136	0.0070113	0.0073701	0.0065755
100	0.0079893	0.0066852	0.0067959	0.0062353
101	0.00681	0.006307	0.0065309	0.0061458
102	0.0059011	0.0060815	0.0066579	0.0062666
103	0.0054816	0.0060815	0.0068125	0.0064233
104	0.0054443	0.0060538	0.0069947	0.0067277
105	0.0056727	0.0058873	0.0073259	0.0069783
106	0.0058918	0.0059115	0.0074032	0.0072559
107	0.0058032	0.005582	0.0071271	0.0074573
108	0.005393	0.0048847	0.0068677	0.0074662
109	0.0048943	0.0044233	0.0066137	0.007229
110	0.0044048	0.0042498	0.0062659	0.006674
111	0.0040599	0.00417	0.0060451	0.0060294
112	0.0037243	0.0040139	0.0055206	0.0053311
113	0.0033514	0.0036045	0.0048195	0.0045925
114	0.0028899	0.003039	0.0041626	0.0038719
115	0.0024145	0.0026401	0.0035939	0.0033347
116	0.0020183	0.0023556	0.0030971	0.0029722
117	0.0017386	0.0021197	0.0027603	0.0028916
118	0.0016035	0.0020295	0.0026333	0.0029229
119	0.0015382	0.0020538	0.002683	0.0029856
120	0.001431	0.0019983	0.002683	0.0029095
121	0.0013005	0.0018803	0.0025892	0.0027126
122	0.0011793	0.0017554	0.0023021	0.0024082
123	0.0010301	0.0015369	0.0019543	0.0020411
124	0.00085766	0.0012489	0.0016231	0.001692
125	0.00074579	0.0010304	0.0013415	0.0013787
126	0.00072715	0.00086037	0.0011207	0.0011056
127	0.00068054	0.00075282	0.00096059	0.00094447
128	0.00063859	0.00073547	0.00086674	0.00083257
129	0.00063392	0.00080139	0.00081153	0.00080123
130	0.0006246	0.0008222	0.00081705	0.00079228
131	0.00063392	0.00083955	0.0008281	0.00080123
132	0.00067121	0.00088118	0.00083362	0.00083257
133	0.00069452	0.00092628	0.00081153	0.00085495
134	0.00071783	0.00096444	0.00080049	0.00089076
135	0.00075045	0.00096791	0.00083914	0.00092657
136	0.00076444	0.0010061	0.00086674	0.00093552
137	0.0008297	0.0010234	0.00088882	0.00098923
138	0.00088097	0.0011518	0.00090539	0.0010206
139	0.00099284	0.0013252	0.00095507	0.001119
140	0.0010954	0.0015507	0.00106	0.0012354
141	0.0012725	0.0018109	0.0012311	0.0014145
142	0.0015196	0.0021613	0.0014464	0.0016428
143	0.0017666	0.0025707	0.0016396	0.0019427
144	0.001953	0.0028725	0.0017887	0.0022023
145	0.0020929	0.0029072	0.0019267	0.0024082
146	0.0021954	0.0027303	0.0019764	0.0024753
147	0.0021442	0.0026019	0.0019157	0.0024798
148	0.0019717	0.0025429	0.0017997	0.0023947
149	0.0018272	0.0025325	0.0017556	0.0023187
150	0.0017573	0.0026123	0.0017832	0.0022694
151	0.0018505	0.0027233	0.0018273	0.0023142
152	0.002023	0.0028586	0.0019322	0.002435
153	0.0021861	0.0029974	0.0019653	0.0026141
154	0.0022374	0.0029315	0.0019322	0.0027349
155	0.0021814	0.0026609	0.0018991	0.00282
156	0.0019997	0.002314	0.0018329	0.0026946
157	0.001706	0.0018907	0.0016783	0.0023679
158	0.001403	0.0014744	0.0014574	0.0019561
159	0.0011467	0.0011518	0.0012697	0.0015935
160	0.00097419	0.00098526	0.0010379	0.0012712
161	0.00084834	0.00085343	0.00086674	0.0010206
162	0.00077376	0.0007771	0.00078945	0.00085942
163	0.0007085	0.00073894	0.00074529	0.00074304
164	0.00067121	0.00069037	0.0006956	0.00068038
165	0.0006013	0.00060711	0.00061279	0.0005819
166	0.00054536	0.00052732	0.00060727	0.00055952
167	0.00050807	0.00045447	0.00054654	0.00048343
168	0.00048477	0.00040243	0.00046373	0.00043419
169	0.00041019	0.00038508	0.00043061	0.00041181
170	0.00038222	0.00035386	0.00041957	0.0003939
171	0.00035891	0.00033651	0.00041957	0.00035362
172	0.00034959	0.0003157	0.00041957	0.00034914
