# Supplementary material for: Mechanism of bidirectional thermotaxis in Escherichia coli
Source: eLife. 2017 Aug 3;6:e26607. doi: 10.7554/eLife.26607 (PMC5578741; doi:10.7554/eLife.26607)
Supplement: Figure 2—source data 1. [file elife-26607-fig2-data1.xlsx]

## Sheet: Fig_2A
T increase to in °C	10uM Ser and 10uM MeAsp	stderror	20uM meAsp and 2uM Ser	stderror	30uM meAsp and 3uM Ser	stderror	50uM meAsp and 5uM Ser	stderror
24	0.40049	0.051514	0	0	0	0	-0.41585	0.10352
27	0.37118	0.04316	0	0	0	0	-0.20694	0.040413
30	0.28968	0.0055188	0	0	0	0	-0.15629	0.03076
33	0.19088	0.01428	0	0	0	0	-0.17138	0.017514
36	0.15475	0.018318	0	0	0	0	-0.1485	0.024519
39	0.050484	0.015422	0	0	-0.017454	0.00282	-0.14821	0.013142
42	0.069207	0.02056	0	0	0	0	-0.11905	0.0091784
