# Supplementary material for: Mechanism of bidirectional thermotaxis in Escherichia coli
Source: eLife. 2017 Aug 3;6:e26607. doi: 10.7554/eLife.26607 (PMC5578741; doi:10.7554/eLife.26607)
Supplement: Figure 2—source data 2. [file elife-26607-fig2-data2.xlsx]

## Sheet: Fig_2B
T increase to in °C	buffer	stderror	25µM MeAsp	stderror	200µM MeAsp	stderror	1000µM MeAsp	stderror
24	0.67536	0.035568	0.53553	0.054022	0.18821	0.043041	0	0
27	0.68851	0.038459	0.47828	0.035246	0.10166	0.04078	0	0
30	0.56536	0.044378	0.29863	0.02867	0.050126	0.015643	0	0
33	0.35833	0.03587	0.14848	0.012529	0.006932	0.0092951	-0.043379	0.013951
36	0.27447	0.026798	0.06023	0.011381	-0.042026	0.024264	-0.068337	0.013511
39	0.15399	0.020639	-0.0061022	0.012221	-0.094942	0.015637	-0.10983	0.014504
42	0.10666	0.0035503	-0.068982	0.0090466	-0.12725	0.022443	-0.079467	0.027211
