# Supplementary material for: Mechanism of bidirectional thermotaxis in Escherichia coli
Source: eLife. 2017 Aug 3;6:e26607. doi: 10.7554/eLife.26607 (PMC5578741; doi:10.7554/eLife.26607)
Supplement: Figure 2—source data 3. [file elife-26607-fig2-data3.xlsx]

## Sheet: Fig_2C
T increase to	buffer	stderror	5µM Ser	stderror	15µM Ser	stderror	100µM Ser	stderror
24	0.72759	0.013696	0.23985	0.0094921	0.23383	0.020288	0.13755	0.019364
27	0.80326	0.021081	0.4943	0.008287	0.15616	0.0088437	0.094158	0.01384
30	0.7352	0.039932	0.23647	0.011016	0.08064	0.0098346	0.083755	0.014938
33	0.46015	0.013484	0.18486	0	0.013246	0.016862	0.023001	0.0038621
36	0.31284	0.018564	0.1189	0	-0.025428	0.015955	-0.05623	0.0070443
39	0.19339	0.008987	0	0.022577	-0.087698	0.010135	-0.096431	0.010522
42	0.084472	0.014273	0	0.022454	-0.097656	0.00058831	-0.11624	0.013738
