# Supplementary material for: Mechanism of bidirectional thermotaxis in Escherichia coli
Source: eLife. 2017 Aug 3;6:e26607. doi: 10.7554/eLife.26607 (PMC5578741; doi:10.7554/eLife.26607)
Supplement: Figure 2—source data 10. [file elife-26607-fig2-data10.xlsx]

## Sheet: Sheet1
		23.2 to 25.9°C			34.5 to 38.1°C			23.2 to 25.9°C			34.5 to 38.1°C
	0.1µM serine	1µM serine	10µM serine	0.1µM serine	1µM serine	10µM serine	10µM MeAsp	100µM MeAsp	500µM MeAsp	10µM MeAsp	100µM MeAsp	500µM MeAsp
TMC	0.2286	0.15	0.1303	0.2407	-0.0165	-0.2129	0.1943	0.0379	-0.0058	0.3011	-0.1239	-0.3018
