# Supplementary material for: Mechanism of bidirectional thermotaxis in Escherichia coli
Source: eLife. 2017 Aug 3;6:e26607. doi: 10.7554/eLife.26607 (PMC5578741; doi:10.7554/eLife.26607)
Supplement: Figure 3—source data 1. [file elife-26607-fig3-data1.xlsx]

## Sheet: Fig_3A
T increase to	buffer	stderror	5µM MeAsp	stderror	10µM MeAsp	stderror	25µM MeAsp	stderror	200 µM MeAsp	stderror
24	0.53942	0.031099	0.29756	0.037056	0	0	-0.21184	0.0087806	-0.43042	0.010838
27	0.36981	0.022086	0.25857	0.029052	0.067264	0.01633	-0.17779	0.014248	-0.46156	0.012665
30	0.26072	0.038595	0.22244	0.0041242	0.042309	0.024427	-0.043136	0.024905	-0.50244	0.030503
33	0.23323	0.0060232	0.17881	0.024657	0.048376	0.02793	0	0	-0.34648	0.0030527
36	0.17257	0.0015643	0.15706	0.030962	0	0	-0.022145	0.012786	-0.36105	0.027278
39	0.14111	0.020911	0.15629	0.01067	0	0	-0.082966	0.047901	-0.3593	0.01225
42	0.056698		0.10074	0.029092	0	0	0	0
