# Supplementary material for: Mechanism of bidirectional thermotaxis in Escherichia coli
Source: eLife. 2017 Aug 3;6:e26607. doi: 10.7554/eLife.26607 (PMC5578741; doi:10.7554/eLife.26607)
Supplement: Figure 3—source data 2. [file elife-26607-fig3-data2.xlsx]

## Sheet: Fig_3B
T increase to	buffer	stderror	1µM ser	stderror	2,5µM Ser	stderror	5µM ser	stderror	100µM Ser	stderror
24	0.48926	0.02568	0.27061	0.0082692	0	0	-0.22455	0.042959	-0.31984	0.095027
27	0.44503	0.037473	0.29813	0.0075054	0	0	-0.13403	0.048244	-0.11495	0.073591
30	0.27677	0.024024	0.2207	0.0038912	0	0	-0.11716	0.030419	-0.063907	0.037698
33	0.18621	0.021552	0.17036	0.019407	-0.047594	0.015915	-0.15156	0.027468	-0.046038	0.032554
36	0.11524	0.016903	0.11956	0.0047313	-0.044026	0.018092	-0.11456	0.017903	-0.089436	0.063241
39	0.03865	0.013828	0.057847	0.016724	-0.067881	0.0049643	-0.16785	0.028983	-0.18923	0.028758
42	0.054787	0.020545	0.065423	0.018889	-0.12372	0.018045	-0.12949	0.047092	-0.074293
