# Supplementary material for: Mechanism of bidirectional thermotaxis in Escherichia coli
Source: eLife. 2017 Aug 3;6:e26607. doi: 10.7554/eLife.26607 (PMC5578741; doi:10.7554/eLife.26607)
Supplement: Figure 3—source data 3. [file elife-26607-fig3-data3.xlsx]

## Sheet: Fig 3C
Condition	(QEQQ and QQQQ)/(EEEE to QEEE)	stderror
0µM MeAsp-21C	0.282614	0.0199912
0µM MeAsp -30C	0.2934	0.0189359
0µM MeAsp -39C	0.297752	0.0125714
10µM MeAsp -21C	0.284824	0.000582207
10µM MeAsp -30C	0.337252	0.0140319
10µM MeAsp -39C	0.330076	0.02977
200µM MeAsp-21C	0.571797	0.0555306
200µM MeAsp -30C	0.522195	0.0218691
200µM MeAsp -39C	0.518049	0.0783996
