# Supplementary material for: Mechanism of bidirectional thermotaxis in Escherichia coli
Source: eLife. 2017 Aug 3;6:e26607. doi: 10.7554/eLife.26607 (PMC5578741; doi:10.7554/eLife.26607)
Supplement: Figure 3—source data 4. [file elife-26607-fig3-data4.xlsx]

## Sheet: Sheet1
	no cells	stderror	preincubation cells	stderror
conc ser (µM)	23.69	1.8148	2.1955	0.18407
