# Supplementary material for: Mechanism of bidirectional thermotaxis in Escherichia coli
Source: eLife. 2017 Aug 3;6:e26607. doi: 10.7554/eLife.26607 (PMC5578741; doi:10.7554/eLife.26607)
Supplement: Figure 5—source data 1. [file elife-26607-fig5-data1.xlsx]

## Sheet: Fig_5A
time (sec)	glycerol	1mM aspartate	1mM serine
1	0.0973	0.1009	0.1027
15.983	0.0984	0.1028	0.104
31.967	0.099	0.1034	0.1047
47.95	0.0993	0.1039	0.1048
63.917	0.0993	0.1041	0.1046
79.9	0.0986	0.1036	0.1041
95.883	0.1	0.1048	0.1052
111.87	0.1	0.1052	0.1054
127.85	0.0998	0.105	0.1051
143.83	0.1003	0.1054	0.1056
159.82	0.1	0.1052	0.1053
175.8	0.1004	0.1055	0.1055
191.77	0.1003	0.1056	0.1056
207.75	0.1002	0.1057	0.1058
223.73	0.1007	0.1059	0.1057
239.72	0.1007	0.106	0.1058
255.7	0.1007	0.106	0.106
271.68	0.1008	0.1062	0.1062
287.67	0.1009	0.1063	0.1061
303.65	0.1011	0.1066	0.1063
319.62	0.1012	0.1067	0.1062
335.6	0.1013	0.1068	0.1063
351.58	0.1014	0.1069	0.1066
367.57	0.1014	0.107	0.1067
383.55	0.1016	0.1071	0.1066
399.53	0.1016	0.1073	0.1066
415.52	0.1017	0.1073	0.1067
431.5	0.1017	0.1074	0.1068
447.47	0.1017	0.1072	0.1067
463.45	0.1018	0.1072	0.1069
479.43	0.1018	0.1076	0.1066
495.42	0.1017	0.1078	0.107
511.4	0.1019	0.1078	0.107
527.38	0.102	0.1076	0.1068
543.37	0.1021	0.1079	0.107
559.33	0.1021	0.1079	0.1071
575.32	0.1018	0.1077	0.1069
591.3	0.1022	0.1077	0.1069
607.28	0.1024	0.1082	0.1071
623.27	0.1022	0.1081	0.107
639.25	0.1023	0.1082	0.1072
655.23	0.1022	0.1081	0.1073
671.22	0.1024	0.1081	0.1073
687.18	0.1023	0.108	0.1072
703.17	0.1023	0.1082	0.1073
719.15	0.1025	0.1083	0.1074
735.13	0.1025	0.1084	0.1073
751.12	0.1019	0.1082	0.107
767.1	0.1024	0.1083	0.1074
783.08	0.1022	0.1086	0.1073
799.07	0.1023	0.1083	0.1072
815.03	0.1023	0.1083	0.1073
831.02	0.1024	0.1085	0.1075
847	0.1025	0.1084	0.1073
862.98	0.1024	0.1082	0.1072
878.97	0.1025	0.1085	0.1076
894.95	0.1024	0.1084	0.1076
910.93	0.1024	0.1084	0.1075
926.9	0.1025	0.1084	0.1076
942.88	0.1027	0.1087	0.1076
958.87	0.1025	0.1087	0.1077
974.85	0.1025	0.1086	0.1078
990.83	0.1027	0.1088	0.1079
1006.8	0.1028	0.109	0.1081
1022.8	0.1026	0.1089	0.108
1038.8	0.1029	0.1091	0.1081
1054.7	0.103	0.1092	0.1081
1070.7	0.1028	0.1091	0.108
1086.7	0.1032	0.1093	0.1085
1102.7	0.1033	0.1096	0.1088
1118.7	0.1033	0.1096	0.1088
1134.7	0.1032	0.1097	0.1087
1150.7	0.1034	0.11	0.1089
1166.6	0.1035	0.1101	0.1089
1182.6	0.1034	0.1102	0.1094
1198.6	0.104	0.1103	0.1094
1214.6	0.1039	0.1105	0.1097
1230.6	0.1038	0.1105	0.1099
1246.5	0.1043	0.1108	0.1098
1262.5	0.1041	0.1109	0.11
1278.5	0.1043	0.111	0.1101
1294.5	0.1047	0.1112	0.1104
1310.4	0.1044	0.1114	0.1105
1326.4	0.1045	0.1115	0.1108
1342.4	0.1047	0.1115	0.111
1358.4	0.105	0.1119	0.1113
1374.4	0.105	0.1121	0.1114
1390.4	0.1052	0.112	0.1117
1406.3	0.1053	0.1124	0.112
1422.3	0.1054	0.1125	0.112
1438.3	0.1054	0.1128	0.1123
1454.3	0.1058	0.1131	0.1127
1470.3	0.1058	0.1134	0.1131
1486.3	0.1059	0.1135	0.1134
1502.2	0.1065	0.114	0.1135
1518.2	0.1064	0.1142	0.114
1534.2	0.1065	0.1142	0.1142
1550.2	0.1068	0.1149	0.1147
1566.2	0.1071	0.1152	0.115
1582.1	0.1069	0.1153	0.1156
1598.1	0.1073	0.1157	0.1161
1614.1	0.1074	0.1161	0.1167
1630.1	0.1078	0.1166	0.1168
1646.1	0.1078	0.1165	0.1173
1662	0.1083	0.1173	0.118
1678	0.1086	0.1178	0.1185
1694	0.1087	0.1179	0.1188
1710	0.1091	0.1187	0.1194
1726	0.1091	0.119	0.1198
1741.9	0.1096	0.1194	0.1206
1757.9	0.1098	0.1199	0.1213
1773.9	0.11	0.1208	0.1218
1789.9	0.1103	0.1211	0.1222
1805.9	0.11	0.1213	0.1223
1821.8	0.1108	0.1225	0.1237
1837.8	0.1113	0.1226	0.1242
1853.8	0.1113	0.1233	0.125
1869.8	0.1115	0.1239	0.1258
1885.8	0.1119	0.1242	0.1269
1901.8	0.1123	0.125	0.1275
1917.7	0.1126	0.1257	0.1288
1933.7	0.1129	0.1264	0.1299
1949.7	0.1132	0.1268	0.1311
1965.7	0.1136	0.1274	0.1324
1981.7	0.114	0.1282	0.1337
1997.6	0.1143	0.1286	0.1349
2013.6	0.1146	0.1295	0.1363
2029.6	0.1151	0.1301	0.1374
2045.6	0.1153	0.1307	0.1388
2061.6	0.1157	0.1314	0.1406
2077.6	0.1162	0.132	0.1425
2093.5	0.1165	0.1329	0.1446
2109.5	0.1168	0.1333	0.147
2125.5	0.1174	0.1343	0.15
2141.5	0.118	0.1351	0.1529
2157.4	0.1182	0.1356	0.1553
2173.4	0.1189	0.137	0.1587
2189.4	0.1194	0.1379	0.1611
2205.4	0.1197	0.1386	0.163
2221.4	0.1205	0.14	0.1652
2237.4	0.1211	0.1413	0.168
2253.3	0.1216	0.1423	0.1703
2269.3	0.1223	0.1438	0.1728
2285.3	0.1231	0.1452	0.1746
2301.3	0.1238	0.1463	0.1763
2317.3	0.1247	0.1477	0.1788
2333.2	0.1256	0.1494	0.1813
2349.2	0.1264	0.1511	0.1836
2365.2	0.1272	0.1522	0.1863
2381.2	0.1282	0.1539	0.189
2397.2	0.1291	0.1554	0.1915
2413.1	0.1298	0.1571	0.1941
2429.1	0.1308	0.1582	0.1967
2445.1	0.1315	0.1595	0.1984
2461.1	0.1321	0.1605	0.2008
2477.1	0.1335	0.1621	0.2038
2493.1	0.1336	0.1626	0.2057
2509	0.1343	0.1637	0.21
2525	0.1347	0.1647	0.2132
2541	0.1355	0.1657	0.2163
2557	0.1361	0.1667	0.2203
2573	0.1364	0.167	0.2219
2588.9	0.1369	0.168	0.2231
2604.9	0.1375	0.1687	0.2236
2620.9	0.1378	0.1691	0.224
2636.9	0.1383	0.1701	0.2245
2652.9	0.139	0.1708	0.2251
2668.9	0.1391	0.1714	0.2285
2684.8	0.1397	0.1723	0.2293
2700.8	0.1387	0.172	0.2307
2716.8	0.1409	0.1745	0.2324
2732.8	0.1408	0.1745	0.2323
2748.8	0.1412	0.1752	0.2324
2764.7	0.1415	0.1759	0.2322
2780.7	0.1418	0.1766	0.2327
2796.7	0.1422	0.1775	0.2329
2812.7	0.1425	0.1783	0.2328
2828.7	0.1426	0.1789	0.2321
2844.6	0.1428	0.1793	0.2319
2860.6	0.1433	0.1799	0.2324
2876.6	0.1432	0.1804	0.232
2892.6	0.1436	0.1813	0.2319
2908.6	0.1439	0.1817	0.232
2924.6	0.1439	0.1826	0.231
2940.5	0.1439	0.183	0.2311
2956.5	0.1444	0.1838	0.2315
2972.5	0.1445	0.1841	0.2314
2988.5	0.1447	0.1847	0.2313
3004.4	0.1443	0.1849	0.2304
3020.4	0.1449	0.1861	0.2315
3036.4	0.1451	0.1866	0.2313
3052.4	0.145	0.1873	0.2317
3068.4	0.1455	0.1877	0.232
3084.4	0.1455	0.1878	0.2317
3100.3	0.1455	0.1883	0.2318
3116.3	0.1457	0.1886	0.2313
3132.3	0.1456	0.1891	0.2316
3148.3	0.1459	0.1899	0.2323
3164.3	0.1461	0.1902	0.2325
3180.2	0.1462	0.1913	0.232
3196.2	0.1462	0.1919	0.2315
3212.2	0.1464	0.1925	0.2316
3228.2	0.1465	0.1928	0.2313
3244.2	0.1465	0.1932	0.2318
3260.1	0.1466	0.1938	0.2323
3276.1	0.1469	0.1949	0.233
3292.1	0.1467	0.196	0.2326
3308.1	0.147	0.1967	0.232
3324.1	0.1472	0.1978	0.2329
3340.1	0.147	0.1982	0.2322
3356	0.1473	0.1988	0.2321
3372	0.1474	0.1999	0.2323
3388	0.1477	0.2004	0.2318
3404	0.1476	0.201	0.2323
3420	0.1472	0.2013	0.232
3435.9	0.1474	0.2022	0.2319
3451.9	0.1481	0.2033	0.2323
3467.9	0.1484	0.2035	0.2324
3483.9	0.1485	0.2038	0.232
3499.9	0.1486	0.2044	0.2318
3515.9	0.1494	0.2059	0.2327
3531.8	0.149	0.2058	0.232
3547.8	0.1491	0.2058	0.2317
3563.8	0.1492	0.2064	0.2321
3579.8	0.1486	0.2061	0.231
3595.8	0.1491	0.2067	0.2314
3611.7	0.1493	0.2083	0.2317
3627.7	0.1489	0.2091	0.2322
3643.7	0.1498	0.2094	0.2323
3659.7	0.1499	0.2097	0.2323
3675.7	0.15	0.2104	0.2321
3691.6	0.1504	0.211	0.2329
3707.6	0.1504	0.2105	0.2329
3723.6	0.1501	0.2111	0.2325
3739.6	0.1498	0.2111	0.2316
3755.6	0.151	0.2121	0.2324
3771.6	0.151	0.2125	0.2322
3787.5	0.1503	0.2125	0.2315
3803.5	0.1514	0.2138	0.2324
3819.5	0.1517	0.2135	0.2321
3835.5	0.1516	0.2135	0.2325
3851.5	0.1519	0.2141	0.2327
3867.4	0.1521	0.2141	0.2321
3883.4	0.1521	0.2146	0.2322
3899.4	0.1525	0.2154	0.2321
3915.4	0.1527	0.2164	0.2322
3931.4	0.1526	0.2169	0.2321
3947.4	0.154	0.2191	0.2334
3963.3	0.1533	0.2189	0.2325
3979.3	0.1532	0.219	0.2325
3995.3	0.1533	0.2193	0.2329
4011.3	0.1539	0.22	0.2334
4027.3	0.1539	0.2202	0.2328
4043.2	0.1541	0.2197	0.2324
4059.2	0.1544	0.2202	0.2328
4075.2	0.1545	0.221	0.2333
4091.2	0.1546	0.2208	0.2331
4107.2	0.1553	0.221	0.2329
4123.1	0.1552	0.2213	0.2327
4139.1	0.1556	0.2214	0.2319
