# Supplementary material for: Mechanism of bidirectional thermotaxis in Escherichia coli
Source: eLife. 2017 Aug 3;6:e26607. doi: 10.7554/eLife.26607 (PMC5578741; doi:10.7554/eLife.26607)
Supplement: Figure 5—source data 2. [file elife-26607-fig5-data2.xlsx]

## Sheet: Fig_5B
time (sec)	glycerol	1mM aspartate	1mM serine
1	0.0826	0.0817	0.0825
15,983	0.0833	0.0825	0.0832
31,967	0.0836	0.0828	0.0833
47.95	0.0836	0.083	0.0836
63,917	0.0836	0.0831	0.0836
79.9	0.0842	0.0832	0.0839
95,883	0.0843	0.0835	0.0839
111.87	0.0845	0.0837	0.084
127.85	0.0841	0.0834	0.0838
143.83	0.0848	0.0841	0.0841
159.82	0.0851	0.0842	0.0841
175.8	0.0851	0.0839	0.084
191.77	0.0853	0.0843	0.0841
207.75	0.0857	0.0845	0.0843
223.73	0.0863	0.085	0.0846
239.72	0.0872	0.0854	0.0847
255.7	0.0876	0.0856	0.0847
271.68	0.0884	0.0861	0.0846
287.67	0.0893	0.0865	0.0845
303.65	0.092	0.0877	0.0852
319.62	0.094	0.0883	0.085
335.6	0.0961	0.0895	0.0851
351.58	0.0995	0.0907	0.0849
367.57	0.1042	0.0929	0.0852
383.55	0.1107	0.0971	0.0856
399.53	0.1185	0.1033	0.0858
415.52	0.1264	0.1132	0.0859
431.5	0.1327	0.1233	0.0861
447.47	0.1396	0.133	0.0859
463.45	0.1447	0.1399	0.0863
479.43	0.1484	0.1456	0.0862
495.42	0.1496	0.1486	0.0865
511.4	0.1509	0.15	0.0867
527.38	0.1516	0.1518	0.0867
543.37	0.1534	0.1547	0.0872
559.33	0.1548	0.1575	0.0875
575.32	0.1564	0.1623	0.0875
591.3	0.1582	0.1675	0.0875
607.28	0.161	0.1713	0.088
623.27	0.1648	0.1736	0.0886
639.25	0.1686	0.1741	0.0882
655.23	0.1698	0.1751	0.0886
671.22	0.1697	0.1757	0.0891
687.18	0.1698	0.1772	0.0895
703.17	0.1709	0.1779	0.0899
719.15	0.1721	0.178	0.0912
735.13	0.1717	0.1776	0.0916
751.12	0.1714	0.1775	0.0925
767.1	0.1713	0.177	0.0936
783.08	0.171	0.177	0.0949
799.07	0.1712	0.1772	0.0965
815.03	0.1712	0.1769	0.0985
831.02	0.1709	0.1769	0.1005
847	0.1707	0.1766	0.1029
862.98	0.1704	0.1764	0.1055
878.97	0.1708	0.1766	0.1087
894.95	0.1709	0.1764	0.1115
910.93	0.171	0.1766	0.1147
926.9	0.1707	0.1764	0.1173
942.88	0.1706	0.1762	0.1204
958.87	0.1707	0.1764	0.1243
974.85	0.1706	0.1762	0.1281
990.83	0.1707	0.1762	0.1331
1006.8	0.1706	0.1759	0.1373
1022.8	0.1708	0.1759	0.1424
1038.8	0.171	0.1766	0.1482
1054.7	0.171	0.1765	0.1525
1070.7	0.1712	0.1762	0.1552
1086.7	0.1706	0.1761	0.1583
1102.7	0.1713	0.1766	0.162
1118.7	0.1715	0.1764	0.1642
1134.7	0.1713	0.176	0.1646
1150.7	0.1714	0.1763	0.1649
1166.6	0.1716	0.1765	0.1657
1182.6	0.1717	0.1766	0.1671
1198.6	0.171	0.1766	0.1684
1214.6	0.1714	0.1768	0.1691
1230.6	0.1719	0.1764	0.1689
1246.5	0.1718	0.1768	0.1689
1262.5	0.1716	0.1764	0.1685
1278.5	0.1719	0.1766	0.1687
1294.5	0.1719	0.1767	0.1684
