# Supplementary material for: Mechanism of bidirectional thermotaxis in Escherichia coli
Source: eLife. 2017 Aug 3;6:e26607. doi: 10.7554/eLife.26607 (PMC5578741; doi:10.7554/eLife.26607)
Supplement: Figure 5—source data 3. [file elife-26607-fig5-data3.xlsx]

## Sheet: Fig_5C
temperature °C	glycerol	stderror	100µM serine	stderror	1mM serine	stderror	1mM aspartate	stderror
24	1970	33823	1912.4	40769	1920.3	26295	2105.2	32448
30	507.82	35894	541.21	15399	704.97	14443	669.26	43.28
39	247.66	15	535.29	36735	804.06	28277	373.76	22382
