# Supplementary material for: Mechanism of bidirectional thermotaxis in Escherichia coli
Source: eLife. 2017 Aug 3;6:e26607. doi: 10.7554/eLife.26607 (PMC5578741; doi:10.7554/eLife.26607)
Supplement: Figure 5—source data 4. [file elife-26607-fig5-data4.xlsx]

## Sheet: 5C_supfig1
temperature °C	glycerol	stderror	100µM serine	stderror	1mM serine	stderror	1mM aspartate	stderror
24	0.00065406	1.4953e-05	0.00085124	2.4433e-05	0.0011234	2.4827e-05	0.00072244	2.3933e-05
30	0.0022395	7.6811e-05	0.002	0.00012416	0.0021652	0.000135	0.0023676	0.00013371
39	0.005908	0.00027436	0.0052279	0.00044021	0.0039994	0.0004167	0.0036992	8.4251e-05
