# Supplementary material for: Mechanism of bidirectional thermotaxis in Escherichia coli
Source: eLife journal article supplement (doi:10.7554/elife.26607), 2017-08-03

**Figure 1 - Figure Supplement 1**

**A**

## Flow-FRET setup

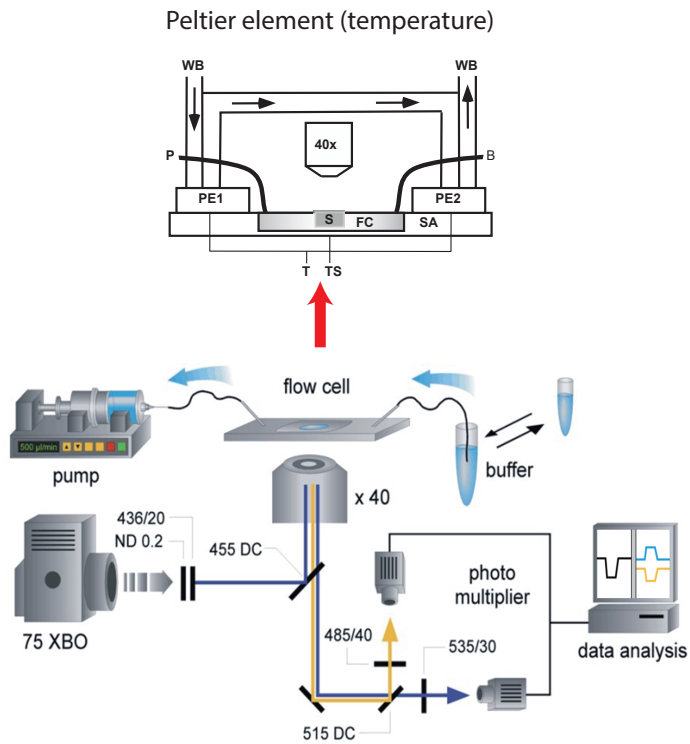

**B**

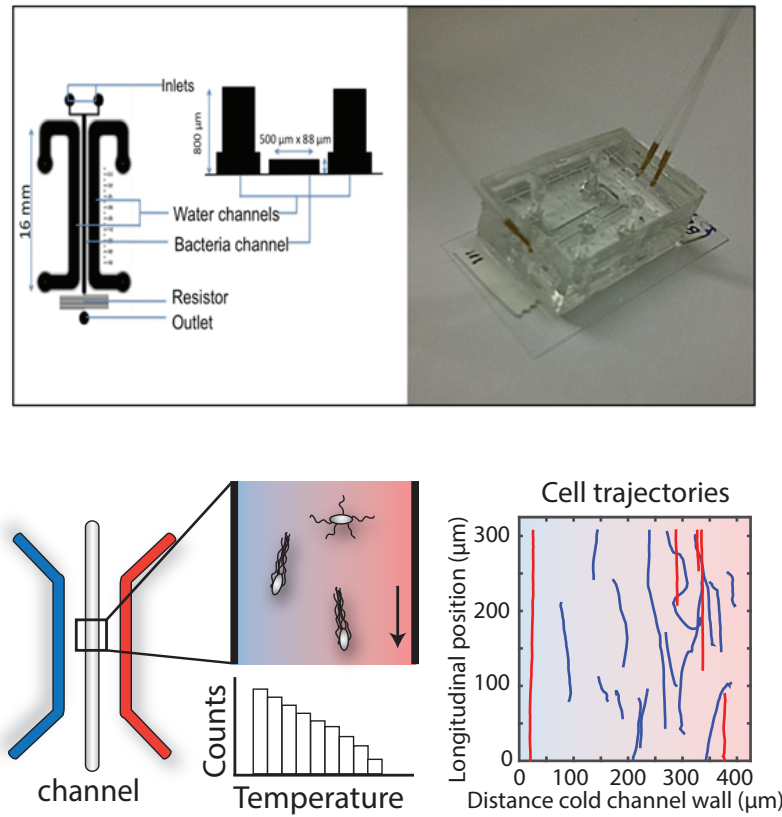

**C**

## Chemotactic response

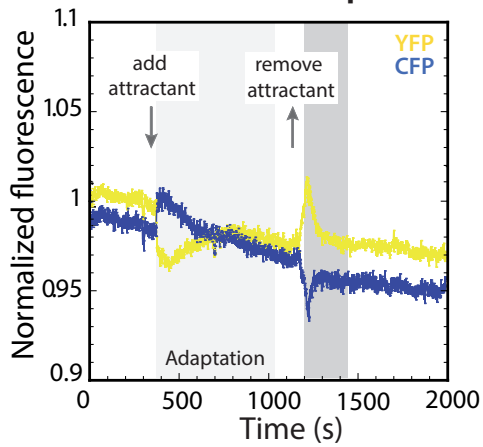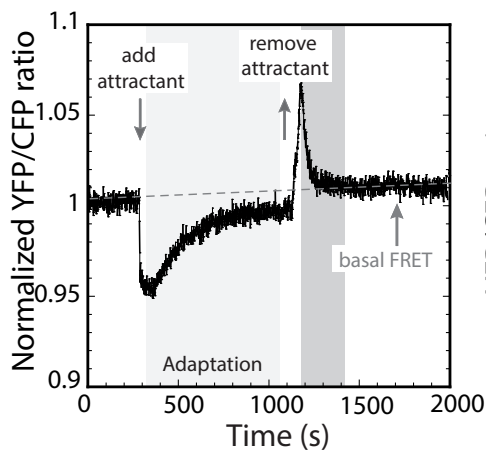

**D**

## Therotactic response

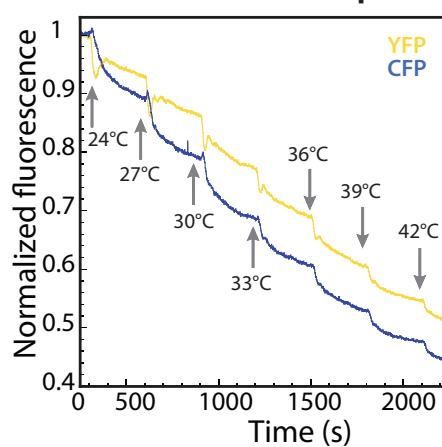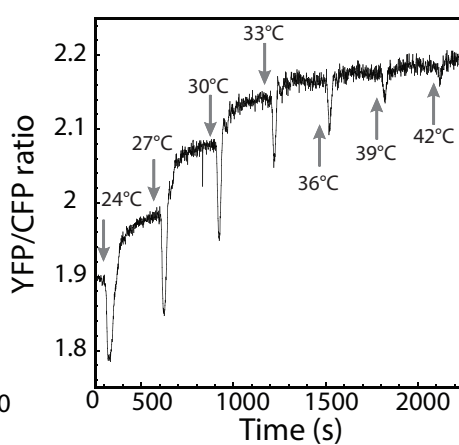

**E**

## Control $\Delta cheA$

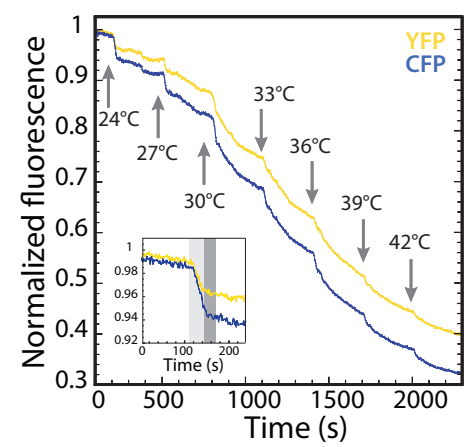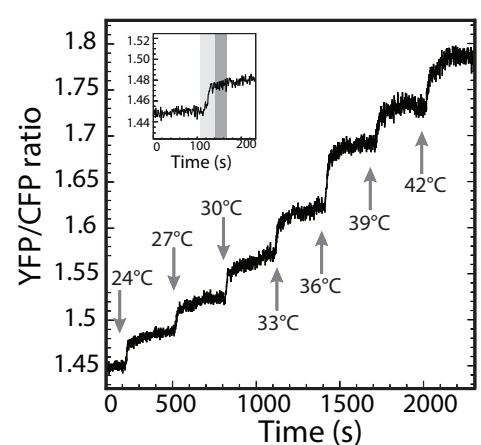

Supplement: supp [file elife_poa_e26607_Figure_1_Figure_Supplement_1.pdf › elife_poa_e26607_Figure_1_Figure_Supplement_1.pdf]
