# Supplementary material for: Mechanism of bidirectional thermotaxis in Escherichia coli
Source: eLife journal article supplement (doi:10.7554/elife.26607), 2017-08-03
Supplement: supp [file elife_poa_e26607_Figure_1_source_data_2.xlsx]

## Sheet: Figure 1C
Distance cold channel wall	23.2-25.9°C	26.8-30.6°C	30.9-34.5°C	34.5-38.1°C	38.9-42.3°C	control
324.686	0.25117	0.22936	0.19943	0.17894	0.14373	0.089719
289.44	0.14893	0.17927	0.17438	0.13747	0.12785	0.078361
254.2	0.15048	0.14027	0.12981	0.11391	0.094055	0.0808
218.96	0.1096	0.089169	0.1156	0.104	0.0956	0.086885
183.71	0.084704	0.078374	0.084713	0.092079	0.087493	0.10389
148.47	0.070731	0.080748	0.085234	0.080489	0.085964	0.10884
113.23	0.05277	0.052609	0.063143	0.079334	0.0903	0.11709
77.98	0.044292	0.048579	0.060504	0.06955	0.08196	0.093203
42.74	0.044543	0.063692	0.050209	0.067607	0.096348	0.10646
7.5	0.042783	0.037927	0.03698	0.076619	0.096697	0.13476

## Sheet: Fig1C_inset
T in °C	TMC	stderror
23.2-25.9	0.3408	0.0001
26.8-30.6	0.2978	0.0045
30.9-34.5	0.2767	0.0019
34.5-38.1	0.2482	0.0058
38.9-42.3	0.0821	0.0087
