# Supplementary material for: Mechanism of bidirectional thermotaxis in Escherichia coli
Source: eLife journal article supplement (doi:10.7554/elife.26607), 2017-08-03
Supplement: supp [file elife_poa_e26607_Figure_2_source_data_4.xlsx]

## Sheet: Sheet1
Distance to cold channel wall (µm)	buffer	100µM MeAsp	100µM MeAsp and 10µM Ser
7.4987	0.0766189	0.146037	0.252852
42.7417	0.0676073	0.127525	0.19547
77.9848	0.0695503	0.118035	0.145568
113.228	0.0793336	0.102967	0.105989
148.471	0.080489	0.0873247	0.0858862
183.714	0.0920794	0.0970473	0.0667029
218.957	0.104002	0.091899	0.0385339
254.2	0.113913	0.0815126	0.0366949
289.443	0.137469	0.0768306	0.0386175
324.686	0.178937	0.0708212	0.0336858
