# Supplementary material for: Mechanism of bidirectional thermotaxis in Escherichia coli
Source: eLife journal article supplement (doi:10.7554/elife.26607), 2017-08-03
Supplement: supp [file elife_poa_e26607_Figure_2_source_data_5.xlsx]

## Sheet: Fiig_2E
Distance to cold channel wall (µm)	normalized cell count
7.4987	0.06694
42.7417	0.059503
77.9848	0.1562
113.228	0.22066
148.471	0.17686
183.714	0.052066
218.957	0.064464
254.2	0.058676
289.443	0.08347
324.686	0.060331
