# Supplementary material for: Mechanism of bidirectional thermotaxis in Escherichia coli
Source: eLife journal article supplement (doi:10.7554/elife.26607), 2017-08-03
Supplement: supp [file elife_poa_e26607_Figure_2_source_data_6.xlsx]

## Sheet: FIg2_sup1A
distance cold channel wall (µm)	0.1µM Serine	1µM serine	10µM serine
7.4987	0.05237	0.0588494	0.084221
42.7417	0.0592559	0.0720287	0.093818
77.9848	0.0610871	0.0818539	0.100278
113.228	0.072091	0.0841803	0.0856193
148.471	0.0819726	0.097337	0.0952859
183.714	0.0983688	0.0961625	0.0957116
218.957	0.115356	0.110087	0.108231
254.2	0.128933	0.122374	0.10996
289.443	0.156688	0.138614	0.112331
324.686	0.173877	0.138512	0.114544
