# Supplementary material for: Mechanism of bidirectional thermotaxis in Escherichia coli
Source: eLife journal article supplement (doi:10.7554/elife.26607), 2017-08-03
Supplement: supp [file elife_poa_e26607_Figure_2_source_data_7.xlsx]

## Sheet: FIg2_sup1B
distance cold channel wall (µm)	0,1µM Serine	1µM serine	10µM serine
7.4987	0.0523451	0.105069	0.143204
42.7417	0.0530435	0.103971	0.132249
77.9848	0.0594727	0.0960862	0.140637
113.228	0.0746009	0.106396	0.131087
148.471	0.0770831	0.116187	0.115957
183.714	0.0831708	0.106292	0.110378
218.957	0.111271	0.112623	0.0823779
254.2	0.136465	0.100364	0.0653456
289.443	0.160724	0.085222	0.0406782
324.686	0.191823	0.0677898	0.0380864
