# Supplementary material for: Mechanism of bidirectional thermotaxis in Escherichia coli
Source: eLife journal article supplement (doi:10.7554/elife.26607), 2017-08-03
Supplement: supp [file elife_poa_e26607_Figure_2_source_data_8.xlsx]

## Sheet: FIg2_sup1C
distance cold channel wall (µm)	10µM MeAsp	100µM MeAsp	500µM MeAsp
7.4987	0.060716	0.088555	0.1094
42.7417	0.05915	0.094418	0.10377
77.9848	0.067539	0.098529	0.092788
113.228	0.079401	0.10304	0.097687
148.471	0.092624	0.086335	0.094764
183.714	0.10117	0.097154	0.099676
218.957	0.11204	0.10289	0.10401
254.2	0.11557	0.10802	0.099768
289.443	0.13762	0.10582	0.096031
324.686	0.17416	0.11524	0.1021
