# Supplementary material for: Mechanism of bidirectional thermotaxis in Escherichia coli
Source: eLife journal article supplement (doi:10.7554/elife.26607), 2017-08-03
Supplement: supp [file elife_poa_e26607_Figure_2_source_data_9.xlsx]

## Sheet: FIg2_sup1C
distance cold channel wall (µm)	10µM MeAsp	100µM MeAsp	500µM MeAsp
7.4987	0.040926	0.14604	0.21522
42.7417	0.056541	0.12752	0.16904
77.9848	0.051378	0.11804	0.13904
113.228	0.063791	0.10297	0.10239
148.471	0.074138	0.087325	0.094212
183.714	0.076962	0.097047	0.088654
218.957	0.11125	0.091899	0.050743
254.2	0.14168	0.081513	0.051963
289.443	0.15249	0.076831	0.040712
324.686	0.23084	0.070821	0.048032
