# Supplementary material for: Mechanism of bidirectional thermotaxis in Escherichia coli
Source: eLife journal article supplement (doi:10.7554/elife.26607), 2017-08-03
Supplement: supp [file elife_poa_e26607_Figure_2_source_data_11.xlsx]

## Sheet: FIg2_sup2A
distance cold channel wall (µm)	buffer normalized cell count
7.4987	0.062087
42.7417	0.065398
77.9848	0.063742
113.228	0.058775
148.471	0.067883
183.714	0.084438
218.957	0.096855
254.2	0.10017
289.443	0.16059
324.686	0.24089
