# Supplementary material for: Mechanism of bidirectional thermotaxis in Escherichia coli
Source: eLife journal article supplement (doi:10.7554/elife.26607), 2017-08-03
Supplement: supp [file elife_poa_e26607_Figure_2_source_data_12.xlsx]

## Sheet: FIg2_sup2B
distance cold channel wall (µm)	1µM serine normalized cell count
7.4987	0.075775
42.7417	0.082705
77.9848	0.09472
113.228	0.097954
148.471	0.08594
183.714	0.093334
218.957	0.096106
254.2	0.11043
289.443	0.12013
324.686	0.13908
