# Supplementary material for: Mechanism of bidirectional thermotaxis in Escherichia coli
Source: eLife journal article supplement (doi:10.7554/elife.26607), 2017-08-03
Supplement: supp [file elife_poa_e26607_Figure_2_source_data_13.xlsx]

## Sheet: FIg2_sup2C
distance cold channel wall (µm)	10µM serine normalized cell count
7.4987	0.091844
42.7417	0.095243
77.9848	0.1146
113.228	0.1142
148.471	0.10998
183.714	0.1078
218.957	0.10312
254.2	0.089108
289.443	0.085383
324.686	0.088712
