# Supplementary figures and images for: Mechanism of bidirectional thermotaxis in Escherichia coli
Source: eLife journal article supplement (doi:10.7554/elife.26607), 2017-08-03

Figure 1 - Figure Supplement 2

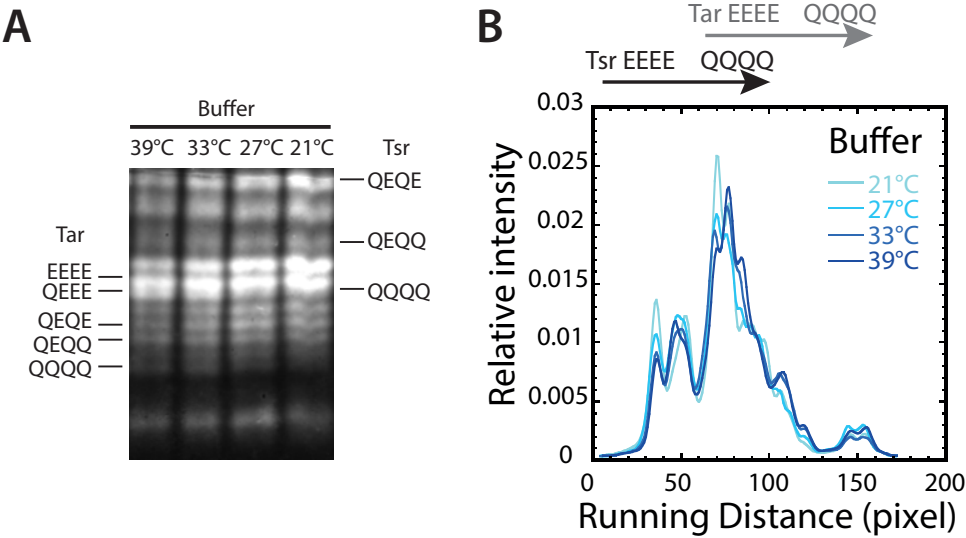

Supplement: supp [file elife_poa_e26607_Figure_1_Figure_Supplement2.pdf › elife_poa_e26607_Figure_1_Figure_Supplement2.pdf]

Figure 1 - Figure Supplement 3

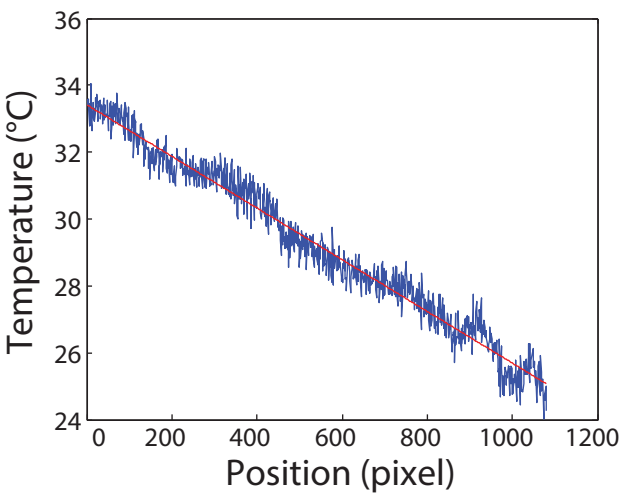

Supplement: supp [file elife_poa_e26607_Figure_1_Figure_Supplement_3.pdf › elife_poa_e26607_Figure_1_Figure_Supplement_3.pdf]

Figure 2 - Figure Supplement 1

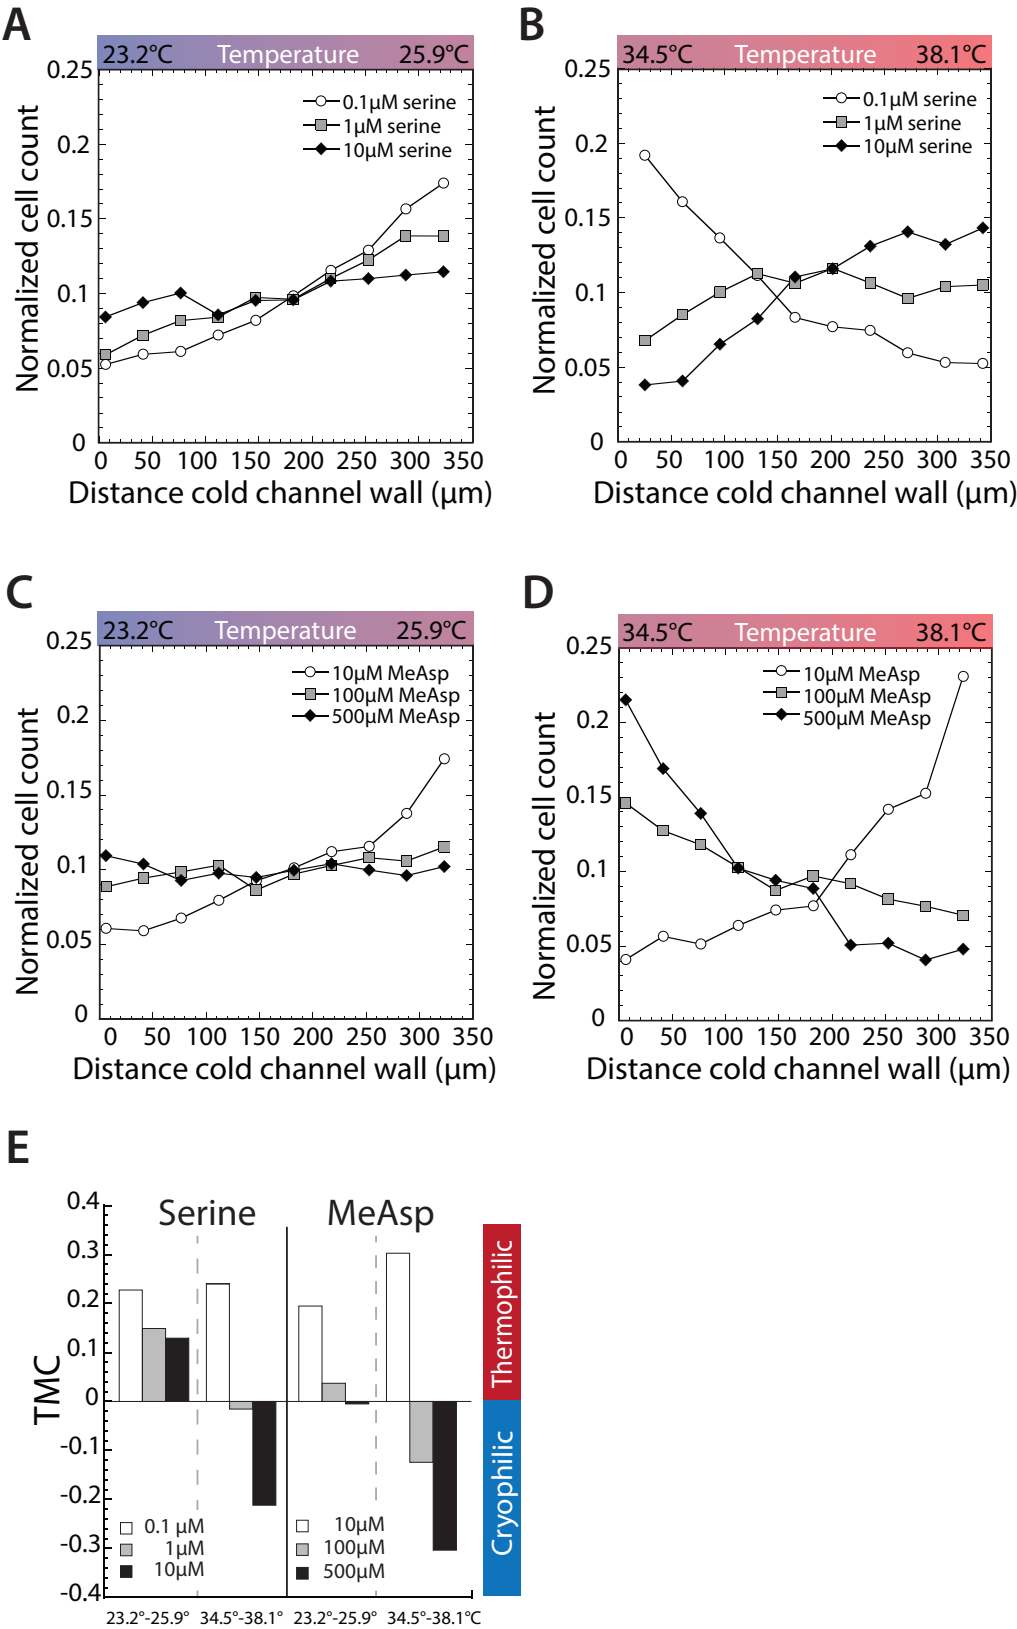

Supplement: supp [file elife_poa_e26607_Figure_2_Figure_Supplement_1.pdf › elife_poa_e26607_Figure_2_Figure_Supplement_1.pdf]

Figure 2 - Figure Supplement 2

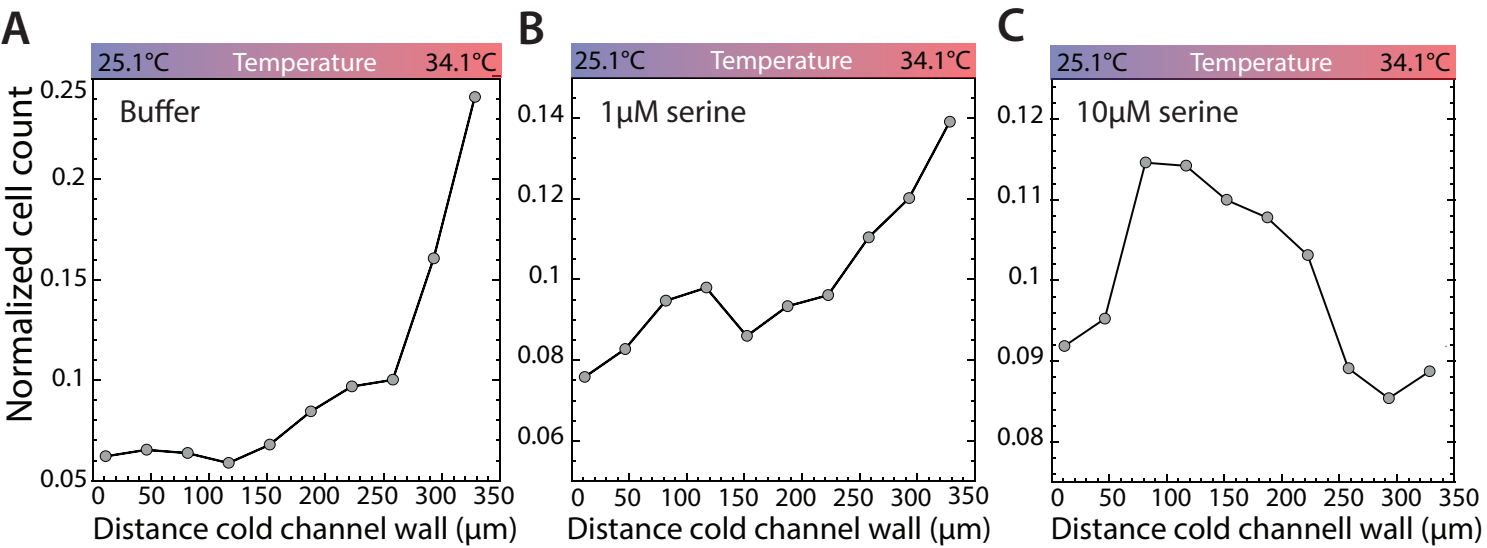

Supplement: supp [file elife_poa_e26607_Figure_2_Figure_Supplement_2.pdf › elife_poa_e26607_Figure_2_Figure_Supplement_2.pdf]

Figure 3 - Figure Supplement 1

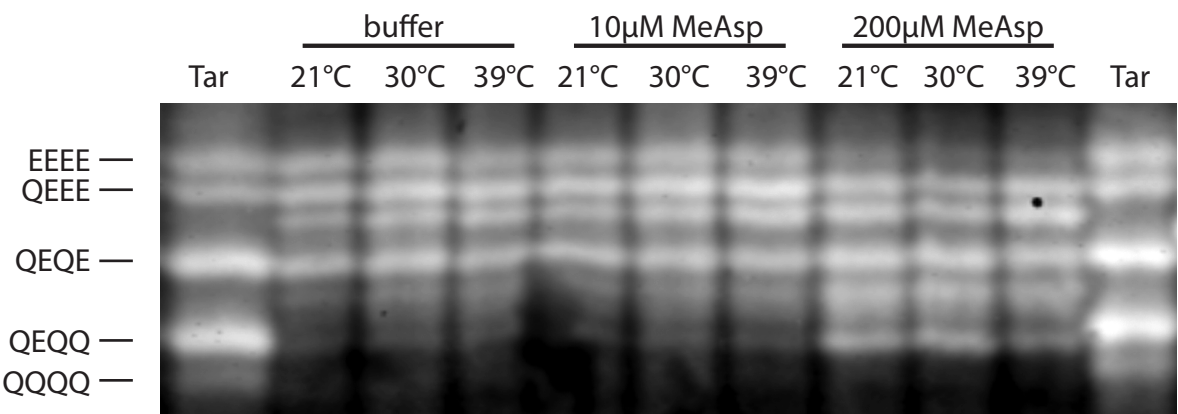

Supplement: supp [file elife_poa_e26607_Figure_3_Figure_Supplement_1.pdf › elife_poa_e26607_Figure_3_Figure_Supplement_1.pdf]

Figure 3- Figure Supplement 2

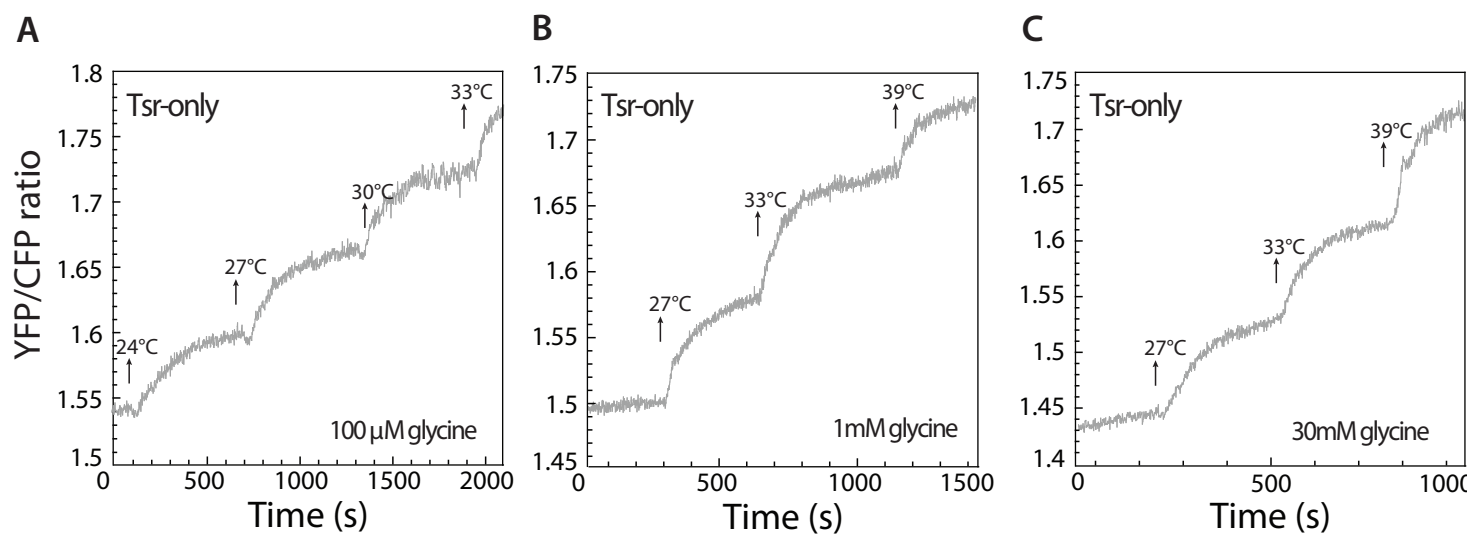

Supplement: supp [file elife_poa_e26607_Figure_3_Figure_Supplement_2.pdf › elife_poa_e26607_Figure_3_Figure_Supplement_2.pdf]

Figure 3- Figure Supplement 3

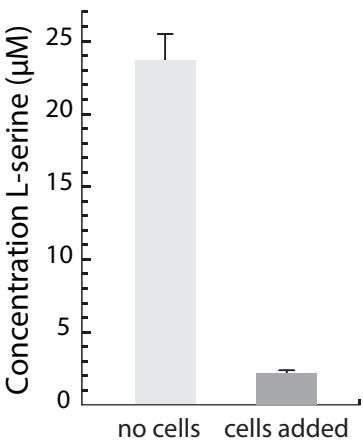

Supplement: supp [file elife_poa_e26607_Figure_3_Figure_Supplement_3.pdf › elife_poa_e26607_Figure_3_Figure_Supplement_3.pdf]

Figure 3 - Figure Supplement 4

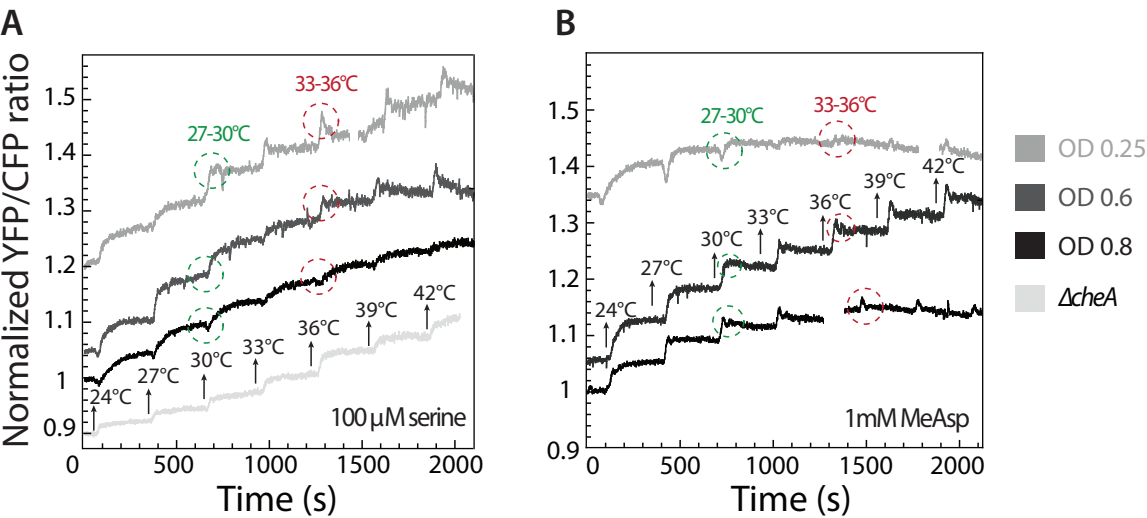

Supplement: supp [file elife_poa_e26607_Figure_3_Figure_Supplement_4.pdf › elife_poa_e26607_Figure_3_Figure_Supplement_4.pdf]

Figure 3 – Figure Supplement 5

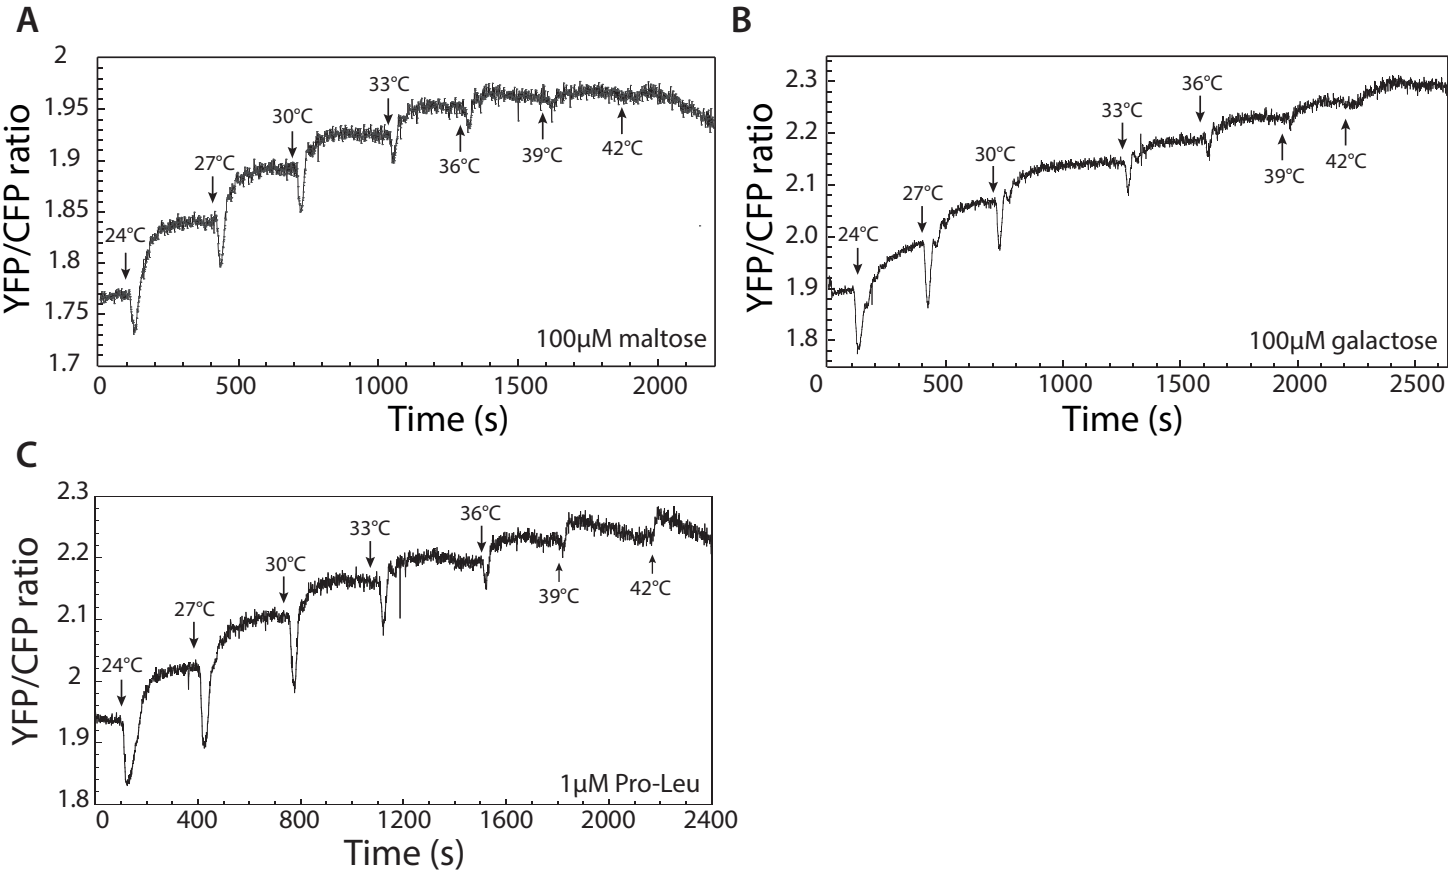

Supplement: supp [file elife_poa_e26607_Figure_3_Figure_Supplement_5.pdf › elife_poa_e26607_Figure_3_Figure_Supplement_5.pdf]

Figure 4 - Figure Supplement 1

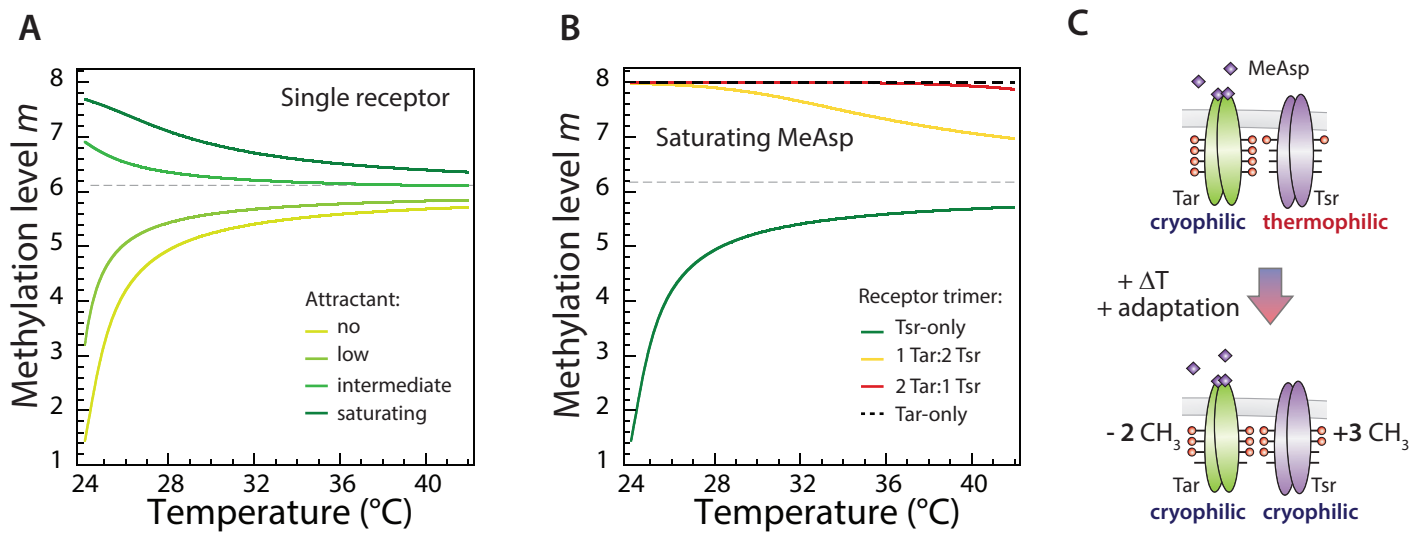

Supplement: supp [file elife_poa_e26607_Figure_4_Figure_Supplement_1.pdf › elife_poa_e26607_Figure_4_Figure_Supplement_1.pdf]

Figure 4 - Figure Supplement 2

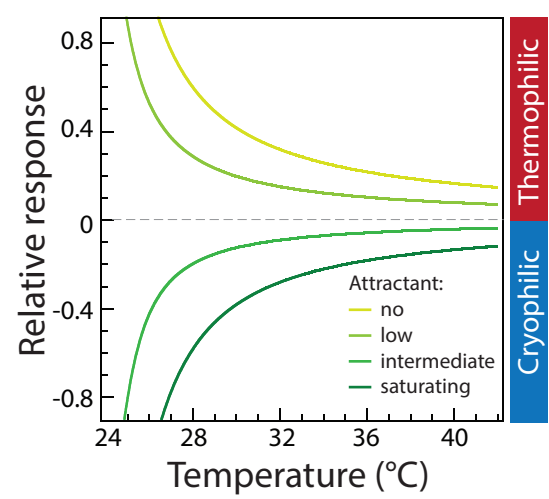

Supplement: supp [file elife_poa_e26607_Figure_4_Figure_Supplement_2.pdf › elife_poa_e26607_Figure_4_Figure_Supplement_2.pdf]

Figure 5 - Figure Supplement 1

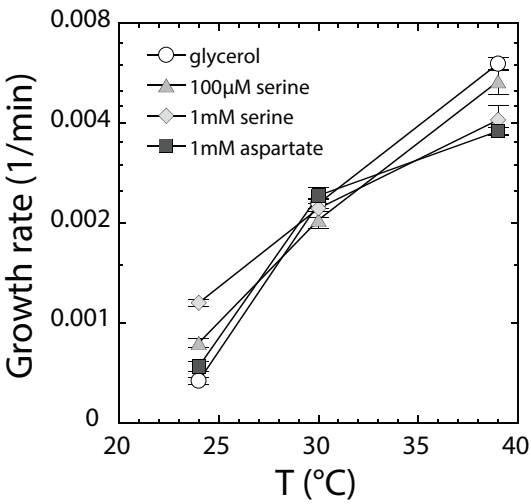

Supplement: supp [file elife_poa_e26607_Figure_5_Figure_Supplement_1.pdf › elife_poa_e26607_Figure_5_Figure_Supplement_1.pdf]
